# Supplementary material for: Virtual patient technology to educate pharmacists and pharmacy students on patient communication: a systematic review
Source: PubMed Central journal article supplement — BMJ Simul Technol Enhanc Learn. 2020 Nov 1;6(6):332–8. doi: 10.1136/bmjstel-2019-000514 (PMC8936658; doi:10.1136/bmjstel-2019-000514), 2020-11-01
Supplement: bmjstel-2019-000514supp001.pdf [file bmjstel-2019-000514supp001.pdf]

## APPENDICES

## Appendix I. Quality assessment of studies.

| <i>Authors, Year of Publication and Study Title</i>                                                                                                                                       | <i>Recruitment Strategy</i>                                                         | <i>Sampling and sample size appropriate?</i>                                                                                                                       | <i>Ethical approval</i>                                                                            | <i>Instrument development</i>                                                                  | <i>Quality measures and significance of findings</i>                                                                                                                          | <i>Overall quality</i> |
|-------------------------------------------------------------------------------------------------------------------------------------------------------------------------------------------|-------------------------------------------------------------------------------------|--------------------------------------------------------------------------------------------------------------------------------------------------------------------|----------------------------------------------------------------------------------------------------|------------------------------------------------------------------------------------------------|-------------------------------------------------------------------------------------------------------------------------------------------------------------------------------|------------------------|
| <i>Bindoff I., Bereznicki L., Westbury J., Chalmers L., Peterson G., Ollington R. 2014<br/>A Computer Simulation of Community Pharmacy Practice for Educational Use</i>                   | Volunteer students that met criteria regarding their level of study and year group. | 33 participants (16 intervention, 17 control).                                                                                                                     | The Social Sciences Human Research Ethics Committee at the University of Tasmania.                 | A detailed description of assessments used.                                                    | The VP scenarios were piloted. Discussion of statistical tests: P values and SD presented. Results discussed significance.                                                    | High                   |
| <i>Douglass M.A., Casale J.P., Skirvi J.A., DiVall V.A. 2013<br/>A Virtual Patient Software Program to Improve Pharmacy Student Learning in a Comprehensive Disease Management Course</i> | Participation occurred automatically as part of a particular pharmacy course.       | 135 participants took part in various aspects of the study.                                                                                                        | Not discussed                                                                                      | Limited information on knowledge questions and survey. Pre- and post-tests were non-identical. | Pre-defined VP definition in the questionnaire to attempt to ensure consistency. Explanation of statistics and P values presented but limited discussion relative to results. | Medium                 |
| <i>Fleming M., Olsen D.E., Stathes H., et al. 2009<br/>Virtual Reality Skills Training for Health Care Professionals in Alcohol Screening and Brief Intervention</i>                      | Recruitment via email and screened via phone. Monetary payment for participation.   | 102 participants over two groups (n=51 in each). No calculation, states sample too small to assess some statistical changes.                                       | The UW Madison Health Sciences Human Subjects Committee.                                           | Detailed description of the VP, the training of SPs, marking and QA.                           | Univariate analysis assessed effect of demographics. Mean scores before and after intervention with t-tests and P values.                                                     | High                   |
| <i>Loke S.K., Tordoff J., Winikoff M., et al. 2011<br/>SimPharm: How pharmacy students made meaning of a clinical case differently in paper- and simulation-based workshops</i>           | Not discussed                                                                       | 20 participants. Fourth-year BPharm students.                                                                                                                      | Not discussed                                                                                      | Discussion of VP. Study used recordings and observation so no instrument.                      | Considerations for transferability, objectivity, reliability, and triangulation. Analysis not detailed due to qualitative approach.                                           | Low                    |
| <i>Shoemaker M.J., De Voest M., Booth A., et al. 2015<br/>A virtual patient educational activity to improve interprofessional competencies: A randomized trial</i>                        | Not discussed                                                                       | 72 fifth semester pharmacy (n=33), fourth-semester physician assistant (n=27) and fourth-semester physical therapy (n=12) graduate students. No size calculations. | The Human Research Review Committees at Grand Valley State University and Ferris State University. | Description of instrument: mixture of self-designed and RIPLS but no further exploration.      | Chi-squared tests, odds ratio, and P values reported. Used the RIPLS within self-designed instruments.                                                                        | Medium                 |
| <i>Taglieri C.A., Crosby S.J., Zimmerman K., Schneider T., Dhiren P.K. 2017</i>                                                                                                           | Participation occurred automatically as part of a particular pharmacy course.       | Control n=140<br>Intervention n=5 141.<br>No further comments on sampling.                                                                                         | Not discussed                                                                                      | Order of labs, clinics, and VP use presented. Explanation of                                   | Peer review of study instruments and protocol. Statistical significance considered, results discussed                                                                         | Medium                 |

|                                                                                                                                                                                   |                                                            |                                                                                              |                                                                                                                                                 |                                                     |                                                                                                                                                 |      |
|-----------------------------------------------------------------------------------------------------------------------------------------------------------------------------------|------------------------------------------------------------|----------------------------------------------------------------------------------------------|-------------------------------------------------------------------------------------------------------------------------------------------------|-----------------------------------------------------|-------------------------------------------------------------------------------------------------------------------------------------------------|------|
| <i>Evaluation of the Use of a Virtual Patient on Student Competence and Confidence in Performing Simulated Clinic Visits</i>                                                      |                                                            |                                                                                              |                                                                                                                                                 | assessment and the survey.                          | relative to significance and P values presented.                                                                                                |      |
| <i>Zary N., Johnson G., Boberg J., et al. 2006</i><br><i>Development, implementation and pilot evaluation of a Web-based Virtual Patient Case Simulation environment – Web-SP</i> | Students from the Karolinska institute.                    | Pharmacy students n=90. Focus on development of software rather than evaluation.             | Not discussed                                                                                                                                   | Focus on VP design, evaluation tools not discussed. | No considerations for measuring significance and no explanation of evaluation.                                                                  | Low  |
| <i>Zlotos L., Power, A., Hill D., Chapman P. 2016</i><br><i>A Scenario-Based Virtual Patient Program to Support Substance Misuse Education</i>                                    | Participation was part of a mandatory educational program. | Interviews of 20 trainees (11 control, 9 VP), with 4 trainees having used both case studies. | The NES research governance group considered the study course evaluation. Guidance was sought from the Chief Scientist Office for NHS Scotland. | Explanation of nature of the questionnaire.         | Pilot of study instruments. Friedman's test indicated a significant difference between the three assessments. All results significant (P<0.05). | High |

Appendix 1. Further evaluation of review studies particularly relating to study quality.
